# Supplementary material for: Oxygen carriers based on electrochemically reduced trinitroarenes
Source: Royal Society of Chemistry journal article supplement (doi:10.1039/b801419a), 2008-01-01
Supplement: b801419a.pdf [file b801419a.pdf]

## SUPPORTING INFORMATION

### **Oxygen Carriers Based on Electrochemically Reduced Trinitroarenes**

Iluminada Gallardo\* and Gonzalo Guirado

[\*]Prof. I.Gallardo, Dr. G.Guirado

Departament de Química, Universitat Autònoma de Barcelona

08193-Bellaterra (Barcelona). Spain

Phone: 00 34 9358121 37 ; Fax: 00 34 935812920

e-mail: [Iluminada.Gallardo@uab.es](mailto:Iluminada.Gallardo@uab.es)

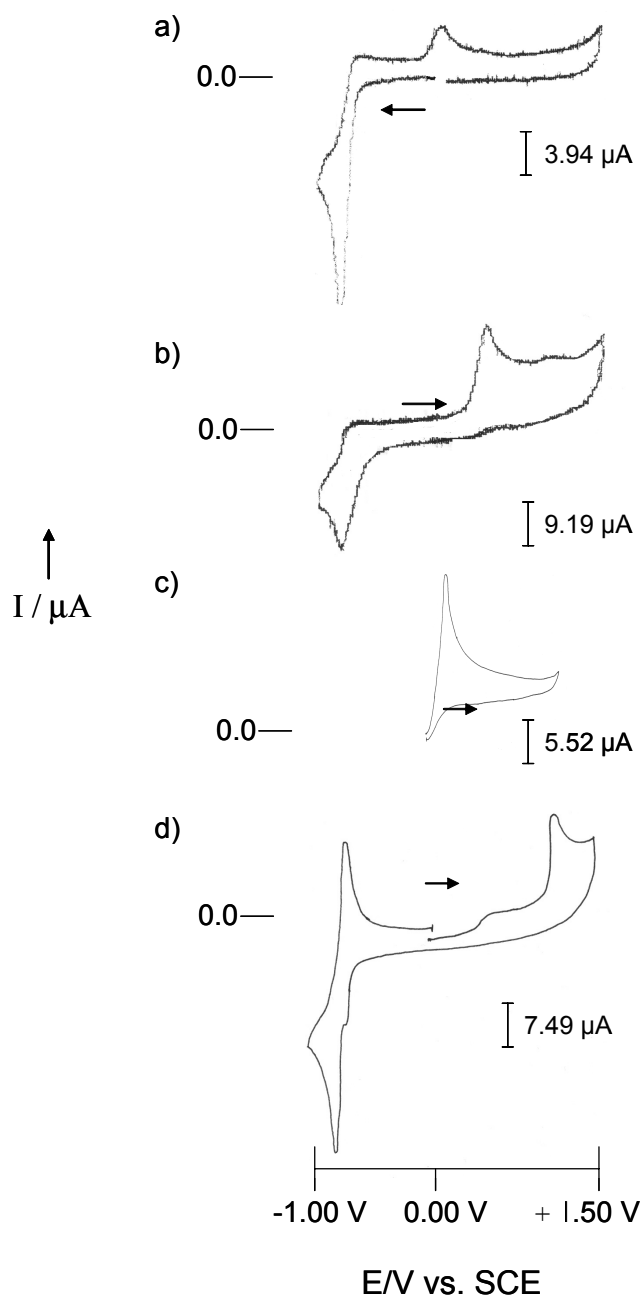

**Figure S1.** Cyclic voltammetry (CV) 4.0 mM in DMF + 0.1M  $n\text{Bu}_4\text{NBF}_4$  at  $10^\circ\text{C}$ . Scan rate 1.0 V/s, glassy carbon disk electrode (0.05 mm diameter). a) of TNT solution *under Ar atmosphere* b) of a TNT electrolyzed solution at -0.75 V after 1F *under Ar atmosphere* ( $\sigma^{\text{H}}$ -dimer) c) of a TNT solution after the addition of equimolecular amount of TDAE ( $\pi$ -dimer,  $\pi\text{-(TNA)}^{2-}$  [ $\text{TDAE}$ ] $^{2+}$ ) *under argon atmosphere* d) of a  $\sigma^{\text{H}}_{\text{o-o}}$ -adduct(TNT) solution *under atmosphere argon atmosphere* ( $\sigma^{\text{H}}_{\text{o-o}}$ -adduct, (TNT) [ $\text{TDAE}$ ] $^{2+}$ , formed by a oxygen purged solution of  $\pi\text{-(TNT)}$  [ $\text{TDAE}$ ] $^{2+}$ ) in the potential range: 0.00/1.50/-1.00/0.00 V.

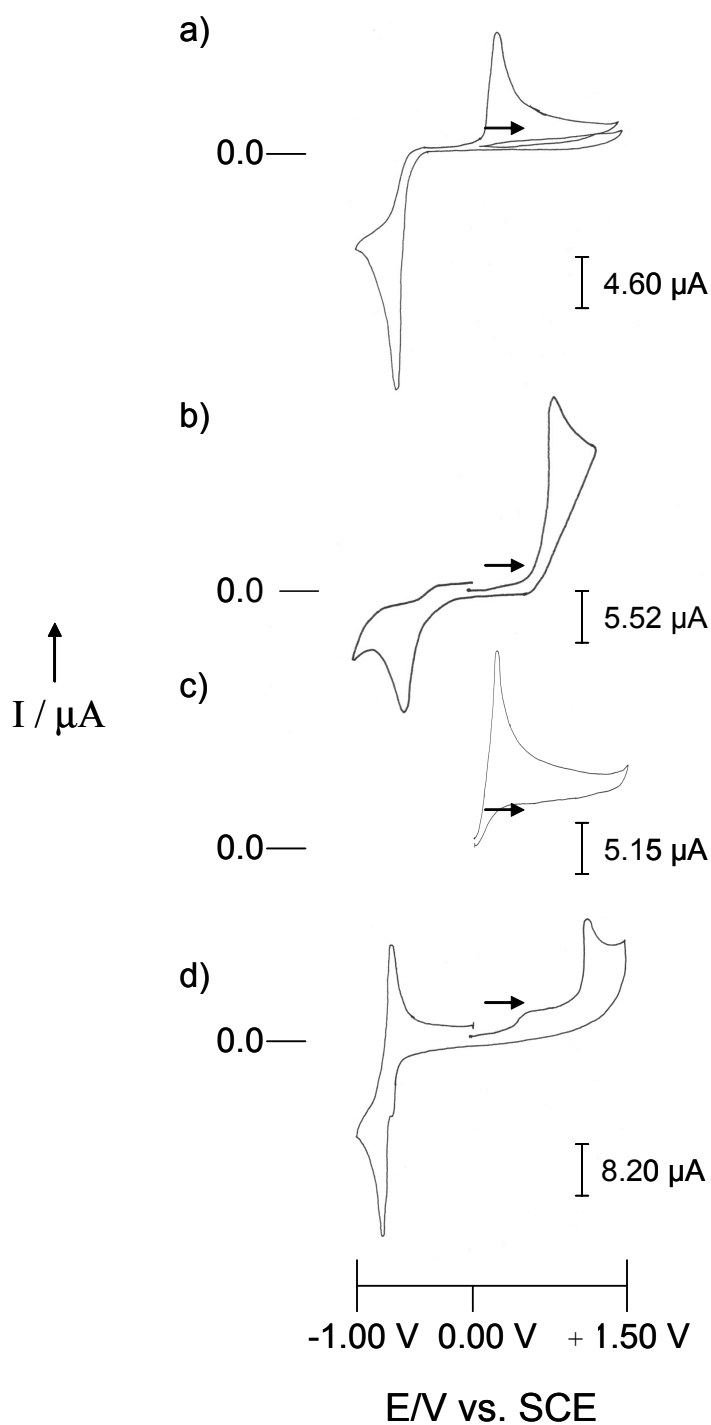

**Figure S2.** Cyclic voltammetry (CV) 4.0 mM in DMF + 0.1M nBu<sub>4</sub>NBF<sub>4</sub> at 10°C. Scan rate 1.0 V/s, glassy carbon disk electrode (0.05 mm diameter). a) of TNA solution under Ar atmosphere b) of a TNA electrolyzed solution at -0.75 V after 1F under Ar atmosphere ( $\sigma^H$ -dimer) c) of a TNA solution after the addition of equimolecular amount of TDAE ( $\pi$ -dimer,  $\pi$ -(TNA)<sup>2-</sup> [TDAE]<sup>2+</sup>) under argon atmosphere d) of a  $\sigma^H_{o-o}$ -adduct(TNA) solution under atmosphere argon atmosphere ( $\sigma^H_{o-o}$ -adduct (TNA)[TDAE]<sup>2+</sup> formed by a oxygen purged solution of  $\pi$ -(TNA)[TDAE]<sup>2+</sup>) in the potential range: 0.00/1.50/-1.00/0.00 V

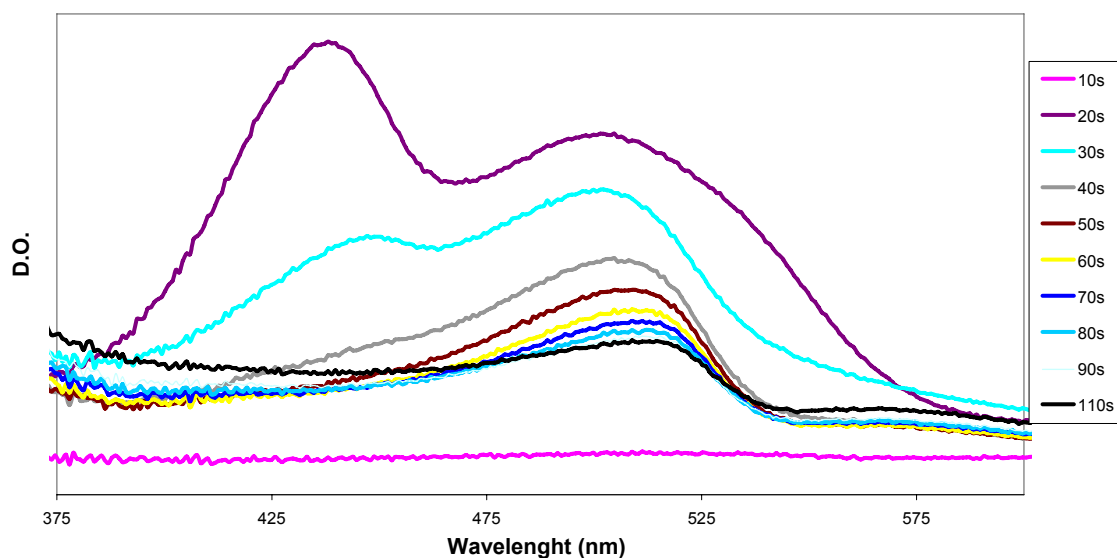

**Figure S3.** In situ UV/Vis spectra (Optical Density) O.D. vs. time (s) during a potential step experiment ( $E_1=0.00$  V;  $E_2= -0.90$  V;  $E_3= 0.00$  V) of  $5.10^{-4}$  M 2,4,6-trinitrotoluene (TNT) in 0.1 M TBABF<sub>4</sub> (acetonitrile, ACN) in the UV/Vis LIGA cell.

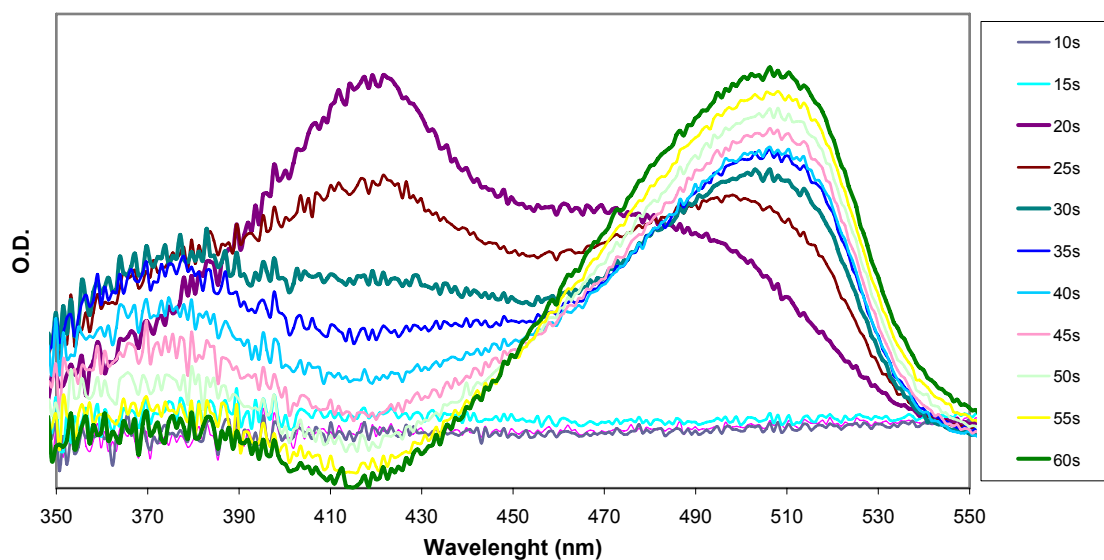

**Figure S4.** In situ UV/Vis spectra (Optical Density) O.D. vs. time (s) during a potential step experiment ( $E_1=0.00$  V;  $E_2= -0.90$  V;  $E_3= 0.00$  V) of  $5.10^{-4}$  M 2,4,6-trinitroanisole (TNA) in 0.1 M TBABF<sub>4</sub> (acetonitrile, ACN) in the UV/Vis LIGA cell.

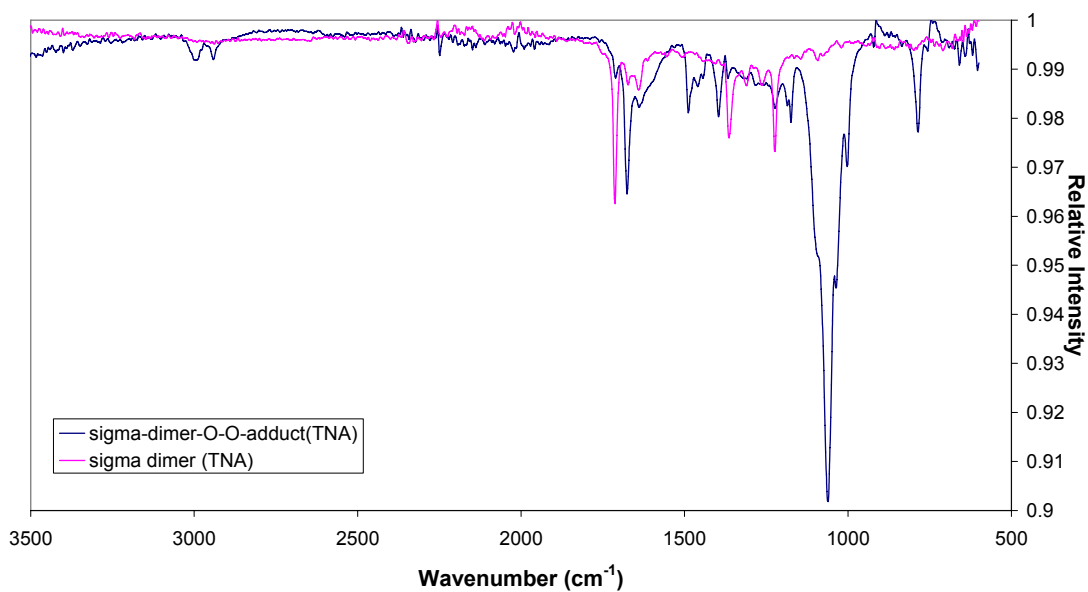

Figure S5. IR spectrum of  $\sigma^{\text{H}}_{\text{O-O}}$ -adduct (TNA) (dark blue line) and  $\sigma^{\text{H}}$ -dimer (TNA) (pink line).

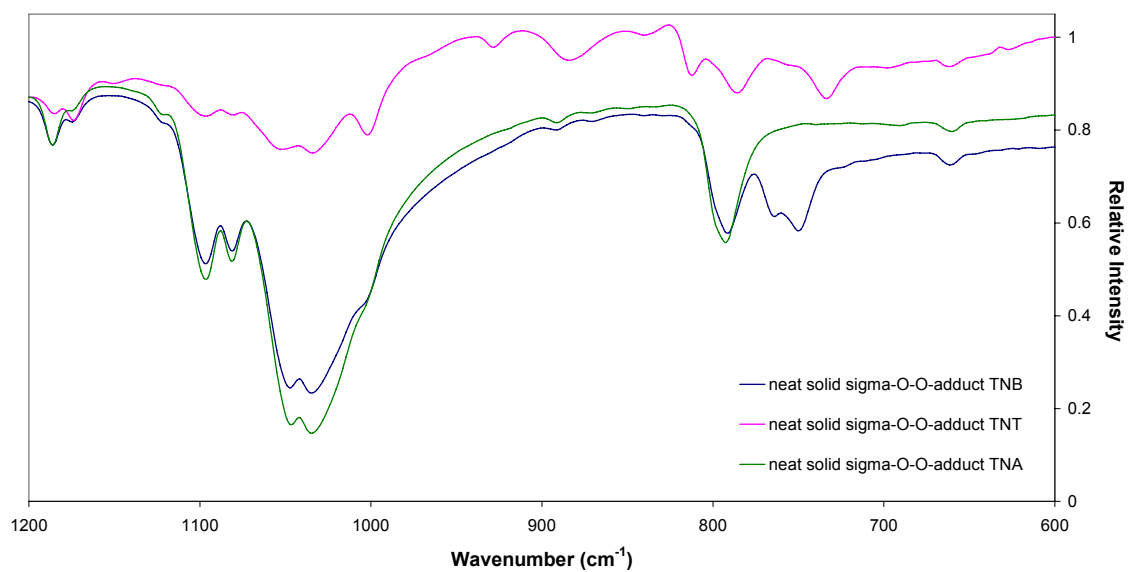

Figure S6. IR spectrum of:  $\sigma^{\text{H}}_{\text{O-O}}$ -adduct (5) (dark blue line),  $\sigma^{\text{H}}_{\text{O-O}}$ -adduct (TNT) (pink line) and  $\sigma^{\text{H}}_{\text{O-O}}$ -adduct (TNA) (dark green line).

**Table ESI-1.** Characterization of Compounds **3** ( $\sigma^{\text{H}}_{\text{C-C}}$ -adduct), **4** ( $\sigma^{\text{H}}_{\text{N=N}}$  -adduct) and **5** ( $\sigma^{\text{H}}_{\text{O-O}}$  -adduct) depicted in Scheme 1.

| Physical data                                                              | <b>3</b> ( $\sigma^{\text{H}}_{\text{C-C}}$ -adduct)                                                                                       | <b>4</b> ( $\sigma^{\text{H}}_{\text{N=N}}$ -adduct)                                                                                                                                                                                                                                           | <b>5</b> ( $\sigma^{\text{H}}_{\text{O-O}}$ -adduct)                                                                                                                                                                  |
|----------------------------------------------------------------------------|--------------------------------------------------------------------------------------------------------------------------------------------|------------------------------------------------------------------------------------------------------------------------------------------------------------------------------------------------------------------------------------------------------------------------------------------------|-----------------------------------------------------------------------------------------------------------------------------------------------------------------------------------------------------------------------|
| <b><sup>1</sup>H NMR</b><br>(250 MHz,<br>CD <sub>3</sub> CN, r.t.,<br>TMS) | $\delta$ =8.15 (s) and 5.53(s)<br>ppm (2:1)                                                                                                | $\delta$ =8.40 (s) and 6.41 (s)<br>ppm (2:1)                                                                                                                                                                                                                                                   | $\delta$ =8.64 (s) and 6.72 (s)<br>ppm (2:1)                                                                                                                                                                          |
| <b>Cyclic Voltammetry</b>                                                  | 0.56 V vs. SCE<br>(irreversible)<br><br>(In the reverse scan we obtain the reduction of the corresponding 1,3,5-trinitrobenzene)           | 1.09 V vs. SCE<br>(pseudo reversible wave)<br><br>(In the reverse scan we ONLY obtain the reduction of the corresponding 1,3,5-trinitrobenzene)                                                                                                                                                | 1.03 V vs. SCE<br>(irreversible)<br><br>(In the reverse scan, it is possible to detect the reduction wave from the liberated O <sub>2</sub> at -0.92 V vs. SCE as well as the corresponding to 1,3,5-trinitrobenzene) |
| <b>IR</b>                                                                  | -                                                                                                                                          | $\nu_{\text{N=N}}$ (1731 cm <sup>-1</sup> )<br><br>NEW band assigned to the azo group stretching mode                                                                                                                                                                                          | $\nu_{\text{O-O}}$ (1060 cm <sup>-1</sup> )<br><br>NEW band assigned to the O-O stretch vibration                                                                                                                     |
| <b>Elemental Analysis (EA)</b>                                             | (C <sub>28</sub> H <sub>46</sub> N <sub>8</sub> O <sub>12</sub> ):<br><br>N 16.4, C 49.0, H 6.7<br><br>found:<br><br>N 15.9, C 48.6, H 6.7 | (C <sub>28</sub> H <sub>46</sub> N <sub>10</sub> O <sub>12</sub> ):<br><br>It has not been able to get enough quantity of highly pure nitrogenated samples. However the experimental nitrogen composition found when the EA was performed was higher than in compounds <b>3</b> and <b>5</b> . | (C <sub>28</sub> H <sub>46</sub> N <sub>8</sub> O <sub>14</sub> ):<br><br>Theoretical<br><br>N 15.6, C 46.9, H 6.4<br><br>found:<br><br>N 15.2, C 47.4, H 6.2.                                                        |
| <b>ESI- (Main Peaks)</b>                                                   | <u>Compound <b>3</b> (<math>\sigma^{\text{H}}_{\text{C-C}}</math>-adduct )</u>                                                             | m/z ( I %)                                                                                                                                                                                                                                                                                     |                                                                                                                                                                                                                       |
|                                                                            | [(C <sub>6</sub> H <sub>3</sub> ) <sub>2</sub> ] <sup>2-</sup>                                                                             | 213 (35%)                                                                                                                                                                                                                                                                                      |                                                                                                                                                                                                                       |
|                                                                            | [((C <sub>6</sub> H <sub>3</sub> )(NO <sub>2</sub> ) <sub>2</sub> (NO) + 2H ] <sup>-</sup>                                                 | 199(61%)                                                                                                                                                                                                                                                                                       |                                                                                                                                                                                                                       |
|                                                                            | [(C <sub>6</sub> H <sub>3</sub> )(NO <sub>2</sub> ) <sub>2</sub> (N) + 2H ] <sup>-</sup>                                                   | 183(100%)                                                                                                                                                                                                                                                                                      |                                                                                                                                                                                                                       |
|                                                                            | [(C <sub>6</sub> H <sub>3</sub> )(NO <sub>2</sub> ) <sub>2</sub> + H ] <sup>-</sup>                                                        | 168(5%)                                                                                                                                                                                                                                                                                        |                                                                                                                                                                                                                       |

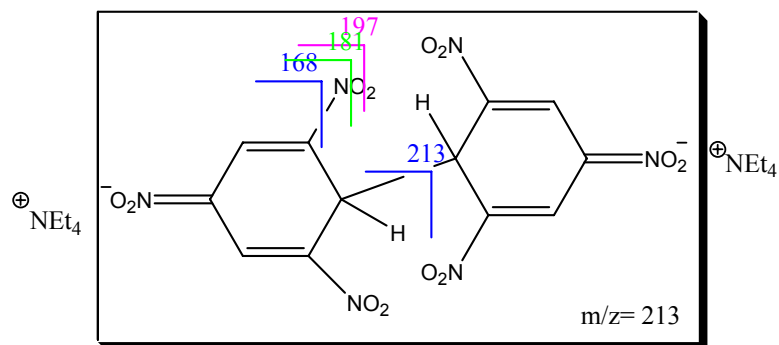

**Compound 4** ( $\sigma_{N=N}^H$ -adduct) m/z (I %)

MW: 714.7

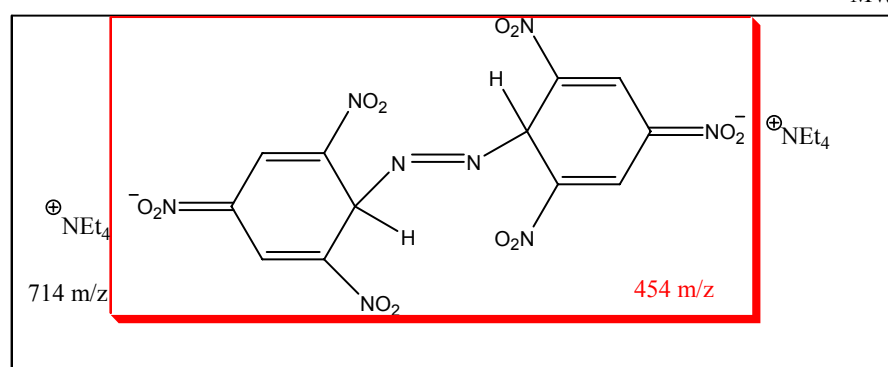

|                                            |            |
|--------------------------------------------|------------|
| $[(C_6H_3)(NO_2)_3N)_2 + 2NEt_4 - H]^+$    | 713 (100%) |
| $[(C_6H_3)(NO_2)_3N)_2 + 2NEt_4 - H]^{2+}$ | 357(99%)   |
| $[(C_6H_3)(NO_2)_3N)_2]^+$                 | 454(6%)    |
| $[(C_6H_3)(NO_2)_3N)_2 + 2H]^+$            | 456(29%)   |

Compound 5 ( $\sigma^{\text{H}}_{\text{O-O}}$ -adduct) m/z ( I %)

MW: 718.7

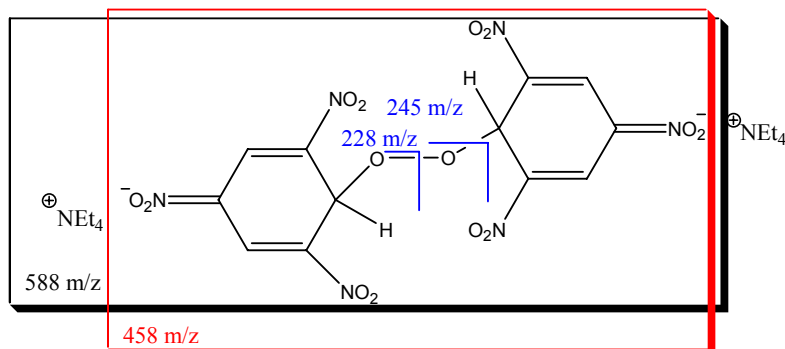

|                                                                                  |            |
|----------------------------------------------------------------------------------|------------|
| $[(\text{C}_6\text{H}_3)(\text{NO}_2)_3\text{O})_2 + \text{NEt}_4 + \text{H}]^-$ | 589 (4%)   |
| $[(\text{C}_6\text{H}_3)(\text{NO}_2)_3\text{O})_2 - \text{H}]^-$                | 457(6%)    |
| $[(\text{C}_6\text{H}_3)(\text{NO}_2)_3\text{OH}]^-$                             | 230 (100%) |
| $[(\text{C}_6\text{H}_3)(\text{NO}_2)_3\text{O}_2]^-$                            | 245(2%)    |
| $[(\text{C}_6\text{H}_3)(\text{NO}_2)_2\text{O}]^-$                              | 183(46%)   |
| $[(\text{C}_6\text{H}_3)(\text{NO}_2)_2\text{O}_2]^-$                            | 199(83%)   |

**Compound 5 (ESI (-)/MS) : Fresh Solution. Color: Red**

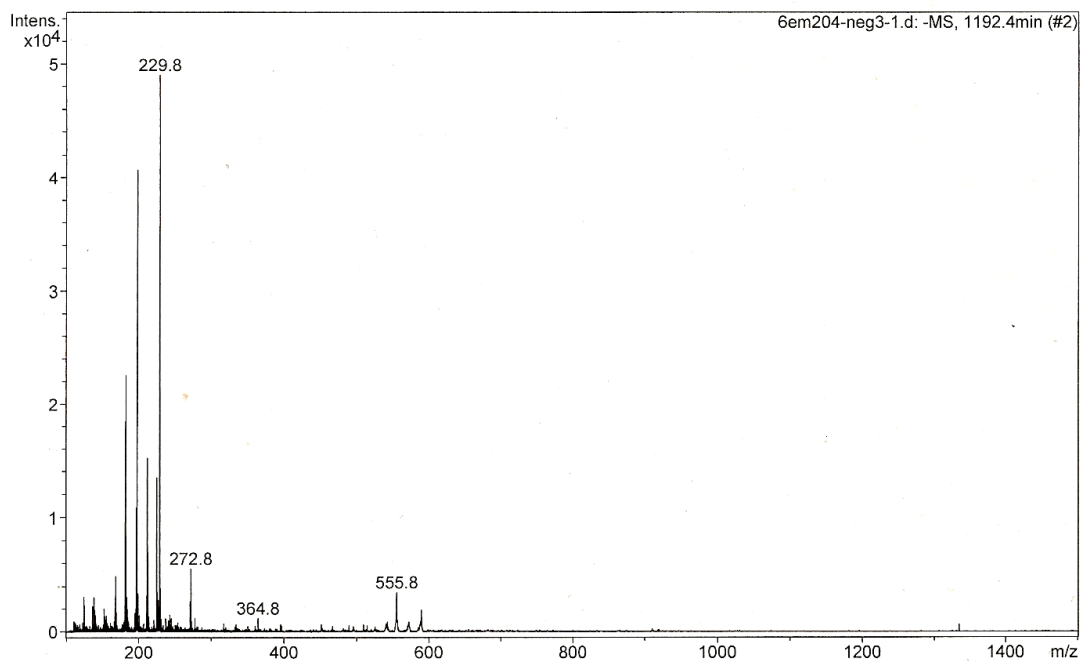



**List of the Main Peaks:**

| <b>m/z</b> | <b>I</b> | <b>I(%)</b> |
|------------|----------|-------------|
| 589.7      | 1912     | 4           |
| 555.6      | 3299     | 7           |
| 555.8      | 3492     | 7           |
| 556.8      | 1033     | 2           |
| 457.2      | 2815     | 6           |
| 225.9      | 13486    | 28          |
| 226.8      | 3471     | 7           |
| 227.8      | 2815     | 6           |
| 229.8      | 48969    | 100         |
| 230.8      | 3841     | 8           |
| 231.8      | 1134     | 2           |
| 212.8      | 15190    | 31          |
| 213.8      | 6997     | 14          |
| 214.8      | 1342     | 3           |
| 198.8      | 40643    | 83          |
| 199.8      | 3385     | 7           |
| 201.8      | 1444     | 3           |
| 182.8      | 22535    | 46          |
| 183.8      | 3069     | 6           |
| 184.8      | 2005     | 4           |
| 185.8      | 1263     | 3           |
